# Supplementary material for: Properties of Gaseous Deprotonated L-Cysteine S-Sulfate Anion [cysS-SO3]−: Intramolecular H-Bond Network, Electron Affinity, Chemically Active Site, and Vibrational Fingerprints
Source: MDPI journal article supplement (doi:10.3390/ijms24021682), 2023-01-14
Supplement: s1 [file s1]

## Supplementary Materials for

### **Properties of Gaseous Deprotonated L-Cysteine S-Sulfate Anion [cysS-SO<sub>3</sub>]<sup>-</sup>: Intramolecular H-Bond Network, Electron Affinity, Chemically Active Site, and Vibrational Fingerprints**

Qiaolin Wang,<sup>a,†</sup> Zhengbo Qin,<sup>a,†</sup> Gaolei Hou,<sup>b</sup> Zheng Yang,<sup>b</sup> Marat Valiev,<sup>c,\*</sup> Xue-Bin Wang,<sup>b,\*</sup> Xianfeng Zheng,<sup>a</sup> Zhifeng Cui<sup>a</sup>

<sup>a</sup>*Anhui Province Key Laboratory of Optoelectric Materials Science and Technology, Anhui Normal University, Wuhu, 241000, China.*

<sup>b</sup>*Physical Sciences Division, Pacific Northwest National Laboratory, 902 Battelle Boulevard, P. O. Box 999, MS K8-88, Richland, Washington 99352, USA.*

<sup>c</sup>*Environmental Molecular Sciences Laboratory, Pacific Northwest National Laboratory, P. O. Box 999, Richland, WA 99352, USA.*

\* Authors to whom correspondence should be addressed.

Electronic mails: [marat.valiev@pnnl.gov](mailto:marat.valiev@pnnl.gov) (M. Valiev),

[xuebin.wang@pnnl.gov](mailto:xuebin.wang@pnnl.gov) (X.-B. Wang)

<sup>†</sup>Qiaolin Wang and Zhengbo Qin contributed equally to this work.

**Table S1.** Calculated vibrational frequencies ( $\text{cm}^{-1}$ ) for the top eight low-lying isomers  $\text{S}_i$  ( $i=1-8$ ) at the CAM-B3LYP/maug-cc-pVTZ level.

| Mode            | $\text{S}_1$ | $\text{S}_2$ | $\text{S}_3$ | $\text{S}_4$ | $\text{S}_5$ | $\text{S}_6$ | $\text{S}_7$ | $\text{S}_8$ |
|-----------------|--------------|--------------|--------------|--------------|--------------|--------------|--------------|--------------|
| Q <sub>1</sub>  | 35           | 30           | 29           | 42           | 22           | 29           | 29           | 25           |
| Q <sub>2</sub>  | 58           | 47           | 49           | 60           | 51           | 88           | 31           | 40           |
| Q <sub>3</sub>  | 109          | 77           | 74           | 71           | 71           | 117          | 67           | 61           |
| Q <sub>4</sub>  | 117          | 134          | 109          | 129          | 96           | 148          | 85           | 107          |
| Q <sub>5</sub>  | 148          | 146          | 145          | 139          | 177          | 167          | 157          | 135          |
| Q <sub>6</sub>  | 192          | 193          | 191          | 173          | 195          | 202          | 181          | 193          |
| Q <sub>7</sub>  | 219          | 209          | 263          | 213          | 211          | 231          | 196          | 201          |
| Q <sub>8</sub>  | 276          | 281          | 283          | 280          | 263          | 257          | 239          | 266          |
| Q <sub>9</sub>  | 307          | 308          | 292          | 300          | 276          | 278          | 278          | 279          |
| Q <sub>10</sub> | 334          | 329          | 320          | 347          | 304          | 282          | 284          | 305          |
| Q <sub>11</sub> | 355          | 362          | 358          | 365          | 327          | 304          | 320          | 331          |
| Q <sub>12</sub> | 373          | 371          | 382          | 383          | 347          | 349          | 360          | 351          |
| Q <sub>13</sub> | 427          | 417          | 483          | 417          | 373          | 381          | 369          | 391          |
| Q <sub>14</sub> | 496          | 496          | 497          | 495          | 495          | 505          | 495          | 490          |
| Q <sub>15</sub> | 509          | 507          | 506          | 505          | 499          | 506          | 498          | 496          |
| Q <sub>16</sub> | 516          | 524          | 518          | 510          | 511          | 581          | 506          | 508          |
| Q <sub>17</sub> | 586          | 596          | 570          | 591          | 578          | 593          | 574          | 556          |
| Q <sub>18</sub> | 596          | 627          | 597          | 597          | 591          | 616          | 578          | 590          |
| Q <sub>19</sub> | 682          | 671          | 670          | 685          | 697          | 678          | 708          | 627          |
| Q <sub>20</sub> | 762          | 768          | 741          | 759          | 737          | 757          | 763          | 676          |
| Q <sub>21</sub> | 818          | 812          | 796          | 794          | 762          | 797          | 777          | 773          |
| Q <sub>22</sub> | 864          | 868          | 874          | 884          | 779          | 864          | 783          | 809          |
| Q <sub>23</sub> | 931          | 942          | 910          | 909          | 821          | 879          | 877          | 855          |
| Q <sub>24</sub> | 968          | 961          | 949          | 929          | 901          | 897          | 953          | 915          |
| Q <sub>25</sub> | 983          | 973          | 984          | 986          | 991          | 969          | 972          | 985          |
| Q <sub>26</sub> | 1064         | 987          | 1011         | 1041         | 1012         | 987          | 994          | 997          |
| Q <sub>27</sub> | 1100         | 1091         | 1070         | 1095         | 1076         | 1070         | 1098         | 1083         |
| Q <sub>28</sub> | 1108         | 1113         | 1142         | 1115         | 1141         | 1141         | 1127         | 1103         |
| Q <sub>29</sub> | 1168         | 1170         | 1168         | 1167         | 1177         | 1155         | 1186         | 1157         |
| Q <sub>30</sub> | 1187         | 1184         | 1178         | 1193         | 1196         | 1175         | 1204         | 1183         |
| Q <sub>31</sub> | 1199         | 1209         | 1203         | 1199         | 1204         | 1231         | 1214         | 1202         |
| Q <sub>32</sub> | 1219         | 1228         | 1222         | 1228         | 1221         | 1242         | 1230         | 1218         |
| Q <sub>33</sub> | 1254         | 1265         | 1263         | 1244         | 1237         | 1269         | 1266         | 1238         |
| Q <sub>34</sub> | 1280         | 1280         | 1275         | 1286         | 1323         | 1293         | 1306         | 1270         |
| Q <sub>35</sub> | 1350         | 1333         | 1342         | 1354         | 1339         | 1352         | 1333         | 1295         |
| Q <sub>36</sub> | 1401         | 1410         | 1399         | 1402         | 1383         | 1375         | 1368         | 1387         |
| Q <sub>37</sub> | 1420         | 1415         | 1413         | 1406         | 1414         | 1408         | 1429         | 1401         |
| Q <sub>38</sub> | 1618         | 1626         | 1607         | 1605         | 1553         | 1606         | 1598         | 1594         |
| Q <sub>39</sub> | 1760         | 1760         | 1763         | 1765         | 1741         | 1740         | 1735         | 1755         |
| Q <sub>40</sub> | 2926         | 2926         | 2899         | 2923         | 2897         | 2936         | 2878         | 2923         |
| Q <sub>41</sub> | 2939         | 2941         | 2948         | 2945         | 2941         | 2962         | 2934         | 2935         |
| Q <sub>42</sub> | 2991         | 2997         | 2997         | 3007         | 2997         | 2995         | 2993         | 2977         |
| Q <sub>43</sub> | 3071         | 3074         | 3124         | 3165         | 3228         | 3078         | 3175         | 3297         |
| Q <sub>44</sub> | 3332         | 3188         | 3206         | 3303         | 3375         | 3356         | 3351         | 3410         |
| Q <sub>45</sub> | 3372         | 3437         | 3442         | 3394         | 3463         | 3425         | 3419         | 3616         |

**Table S2.** QTAIM parameters for the top two isomers calculated at the CAM-B3LYP/maug-cc-pVTZ level.

| Hydrogen-bond type   |   |         | BCP $\rho(r)$ | BCP $\nabla^2\rho(r)$ | BCP $H(r)$ | E <sub>HB</sub> |
|----------------------|---|---------|---------------|-----------------------|------------|-----------------|
|                      |   |         | [a.u.]        | [a.u.]                | [a.u.]     | [kcal/mol]      |
| <b>S<sub>1</sub></b> | a | O-H...N | 0.050         | 0.100                 | -0.0107    | -17.71          |
|                      | b | N-H...O | 0.018         | 0.068                 | 0.0026     | -7.12           |
|                      | c | N-H...O | 0.015         | 0.053                 | 0.0022     | -5.94           |
| <b>S<sub>2</sub></b> | a | O-H...N | 0.049         | 0.098                 | -0.0103    | -17.49          |
|                      | b | N-H...O | 0.032         | 0.096                 | 0.0020     | -11.75          |

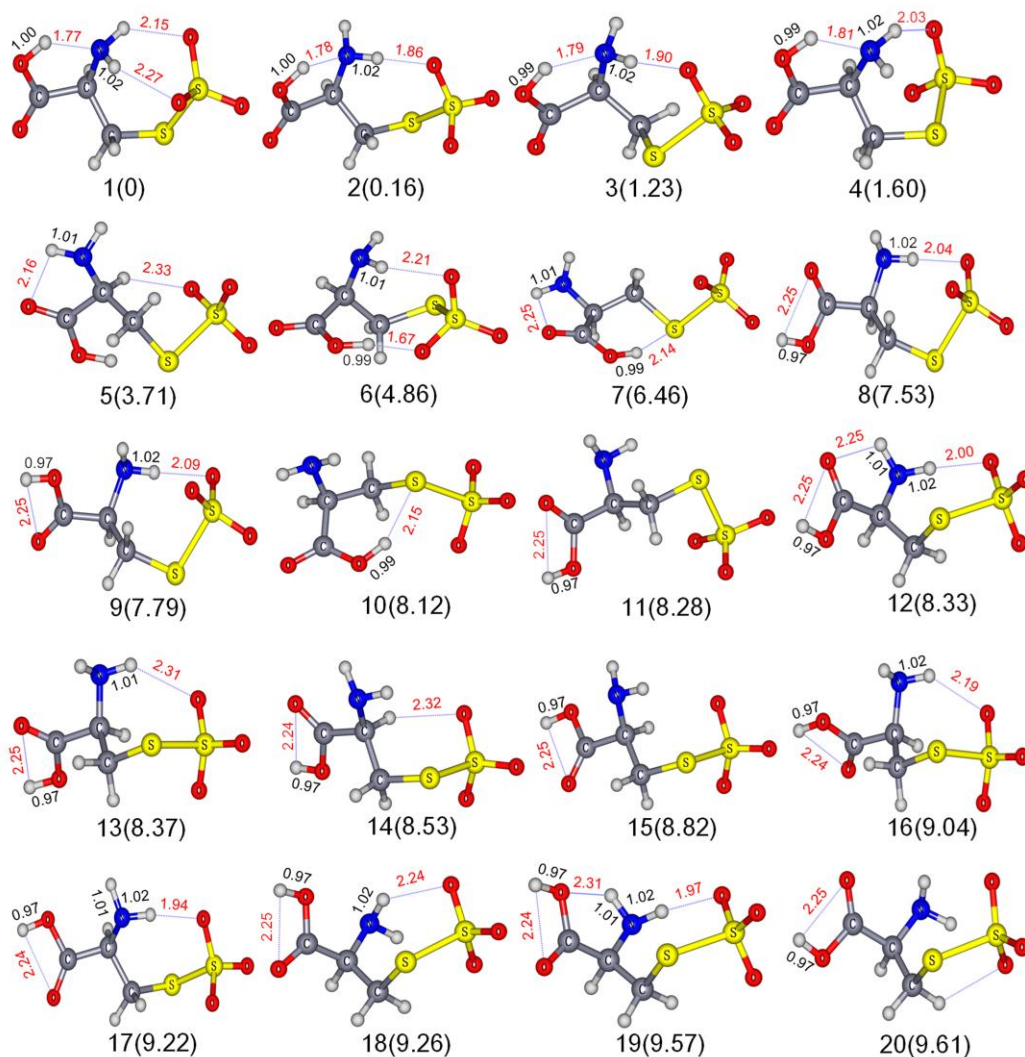

**Figure S1.** Top twenty conformers of cysteine perthiosulfonate anion  $[\text{cysS-SO}_3]^-$  calculated at the CAM-B3LYP/maug-cc-pVTZ level. The relative energies at 0 K (kcal/mol, including ZPE) are indicated in parenthesis below each structure.

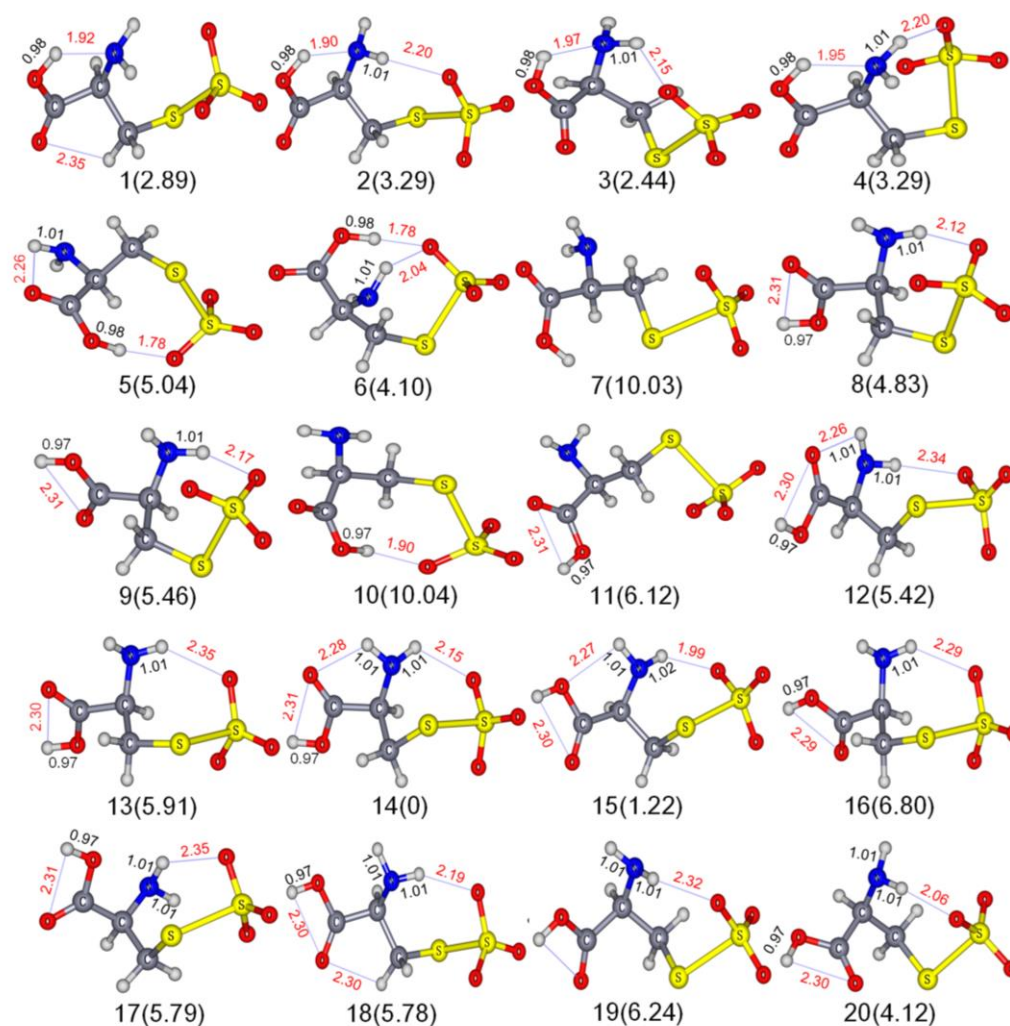

**Figure S2.** Top twenty conformers of  $[\text{cysS-SO}_3]^\bullet$  radical calculated at the CAM-B3LYP/maug-cc-pVTZ level. The relative energies at 0 K (kcal/mol, including ZPE) are indicated in parenthesis below each structure.

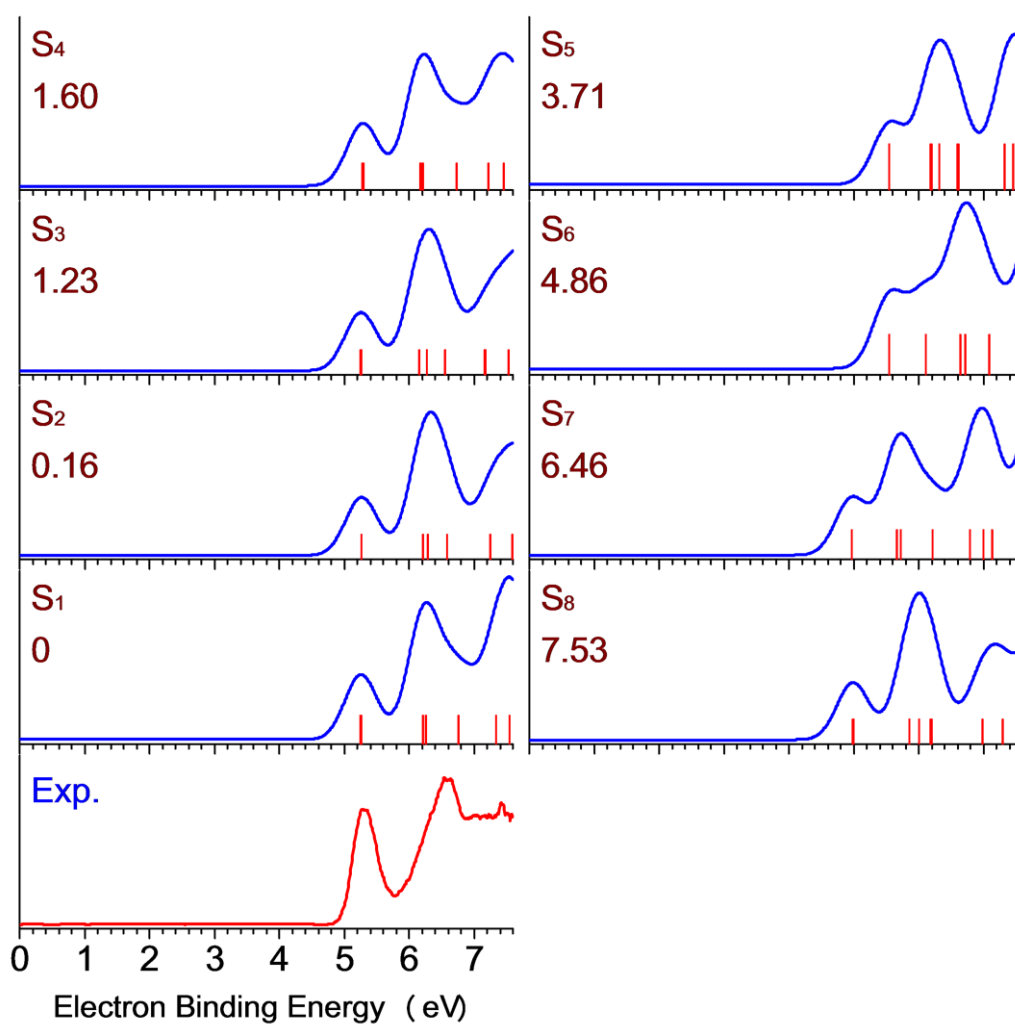

**Figure S3.** Simulated photoelectron spectra at the level of TD-CAM-B3LYP for  $S_i$  ( $i = 1-8$ ) (FWHM = 0.35 eV) along with the experimental one for comparison.

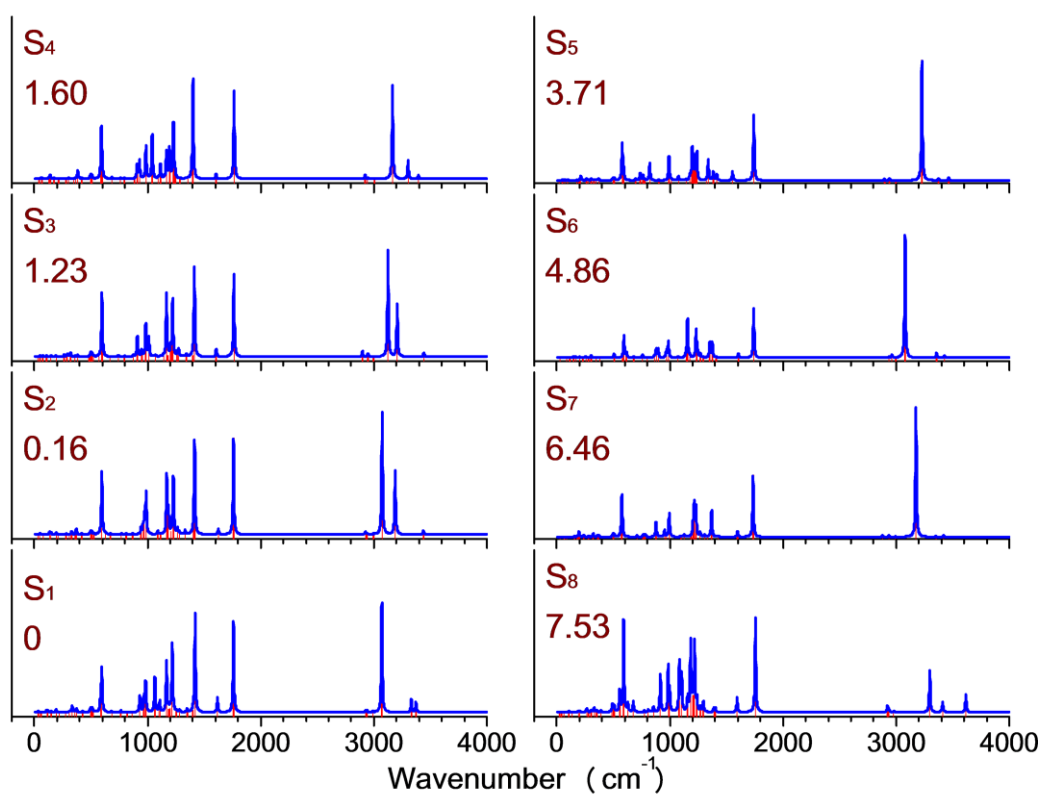

**Figure S4.** Simulated IR spectra at the level of CAM-B3LYP in the range of 0  $\text{cm}^{-1}$  and 4000  $\text{cm}^{-1}$  for  $S_i$  ( $i = 1-8$ ) (FWHM = 10  $\text{cm}^{-1}$ , scaled by 0.954).
